# Supplementary material for: METTL3 increases cisplatin chemosensitivity of cervical cancer cells via downregulation of the activity of RAGE
Source: PubMed Central journal article supplement (PMC8424130; doi:10.1016/j.omto.2021.05.013), 2021-06-04
Supplement: mmc1.pdf [file mmc1.pdf]

**OMTO, Volume 22**

**Supplemental information**

**METTL3 increases cisplatin chemosensitivity  
of cervical cancer cells via downregulation  
of the activity of RAGE**

**Ruyi Li, Yizuo Song, Xin Chen, Man Chu, Zhi-wei Wang, and Xueqiong Zhu**

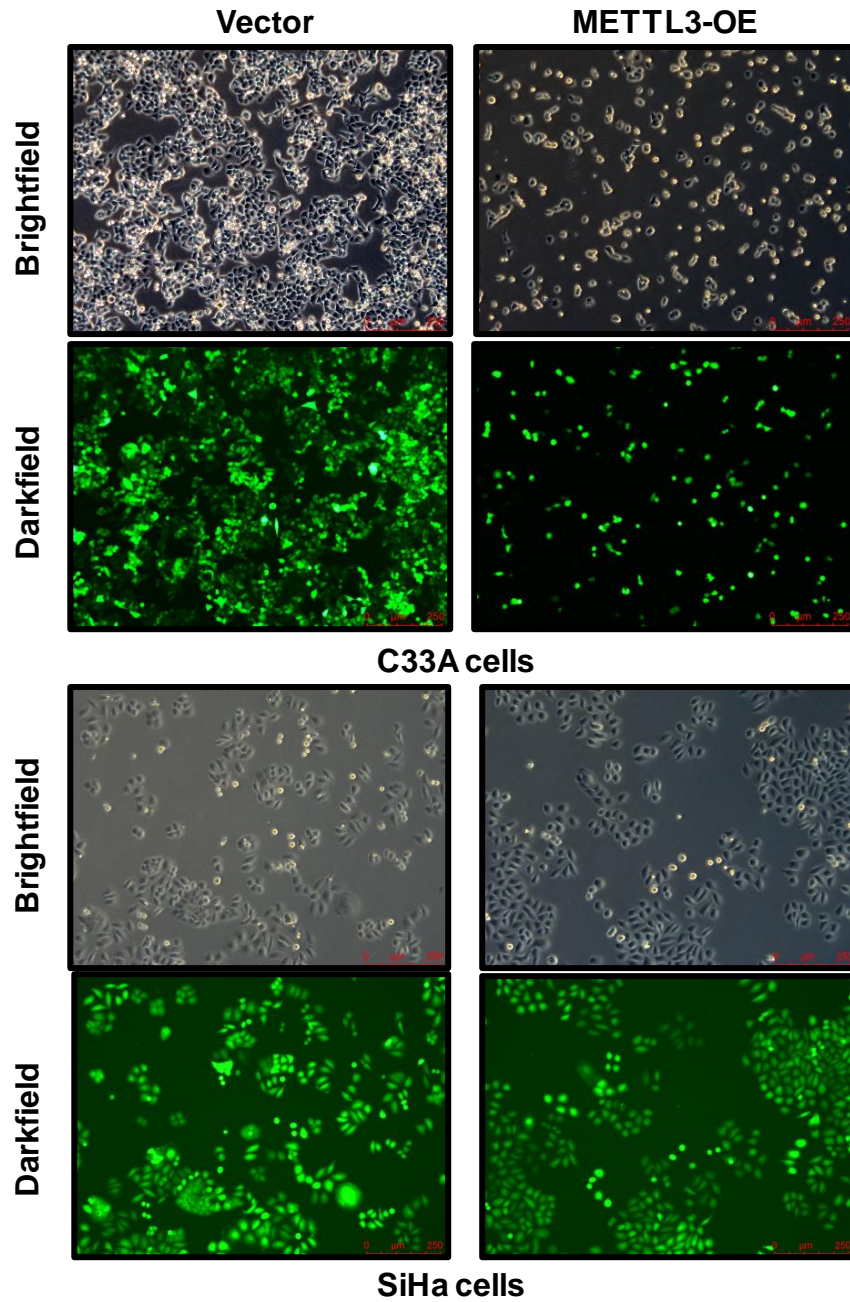

**Supplementary figure 1. METTL3 inhibits viability of cervical cancer cells.** SiHa cells with METTL3 cDNA transfection was observed under brightfield, and their GFP-green fluorescences were observed under darkfield of microscope ( $\times 100$  magnification).

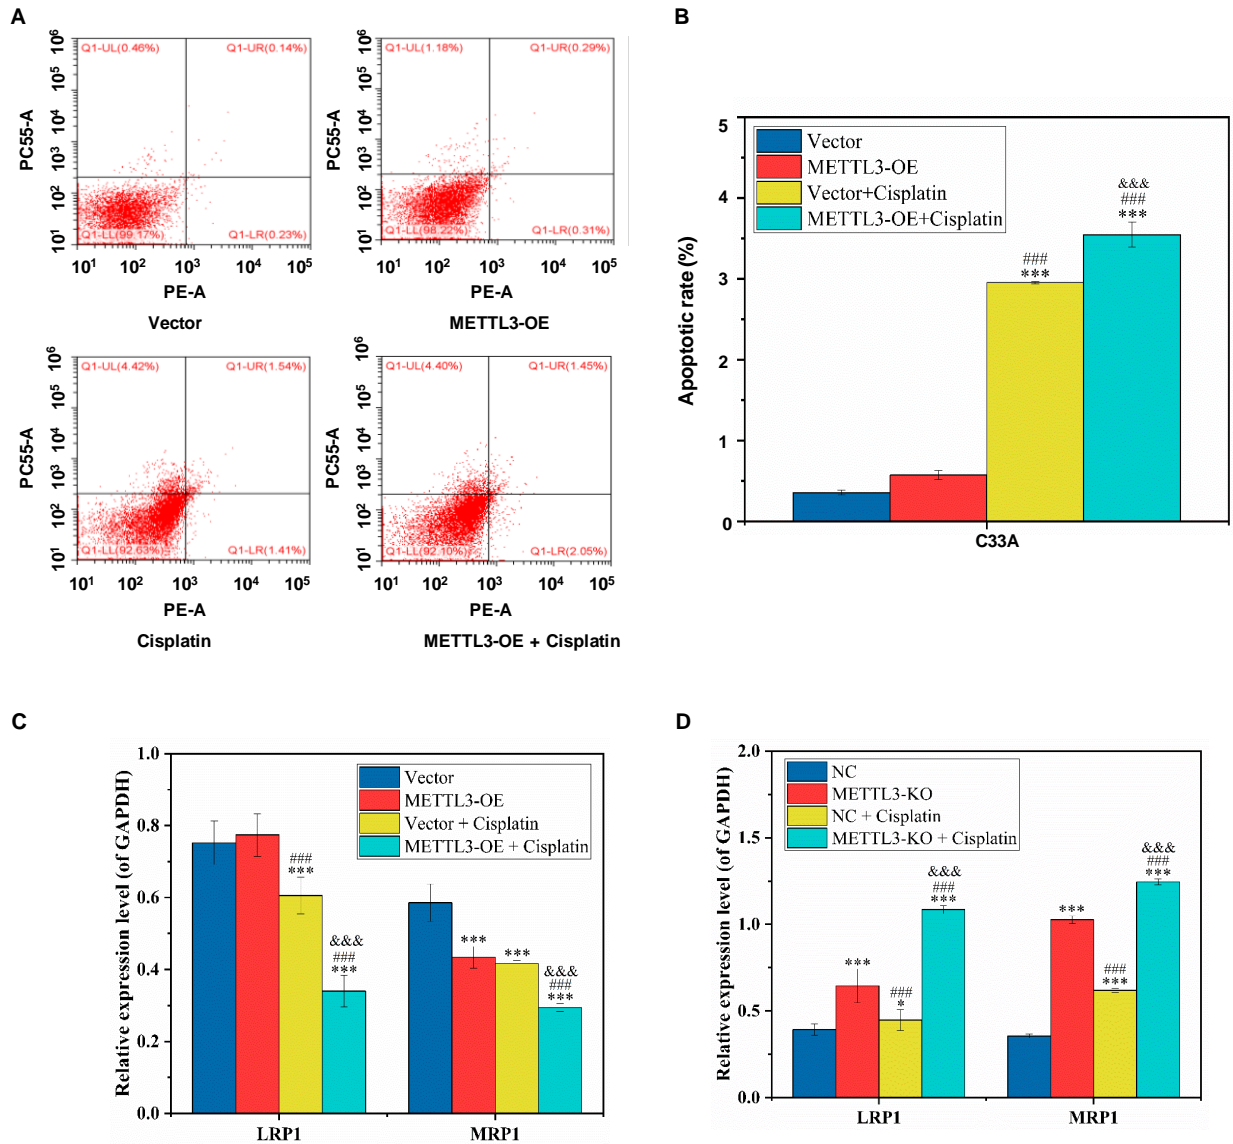

**Supplementary figure 2: The effect of METTL3 on cisplatin sensitivity in cervical cancer cells.** A-B: The difference of chemotherapeutic sensitivity of cisplatin between C33A cells with METTL3 overexpression and Vector-C33A cells was analyzed by Flow cytometry. C: Quantitative results are shown for Figure 2D. D: Quantitative results are shown for Figure 2H.
